# Supplementary material for: Presence of Antibodies against Sindbis Virus in the Israeli Population: A Nationwide Cross-Sectional Study
Source: PubMed Central journal article supplement (PMC6630228; doi:10.3390/v11060542), 2019-06-11
Supplement: viruses-11-00542-s001.pdf [file viruses-11-00542-s001.pdf]

Supplementary Table 1: ELISA and SINV NT results

| Sample No. | ELISA results<br>(ELISA index value) | SINV NT (Cut off value) |
|------------|--------------------------------------|-------------------------|
| 1          | Positive (3.56)                      | Negative                |
| 2          | Positive (2.66)                      | Negative                |
| 3          | Positive (4.76)                      | Negative                |
| 4          | Positive (12.59)                     | Positive (1:10)         |
| 5          | Positive (2.88)                      | Negative                |
| 6          | Positive (3.09)                      | Negative                |
| 7          | Positive (4.72)                      | Positive (1:10)         |
| 8          | Positive (3)                         | Negative                |
| 9          | Positive (2.36)                      | Positive (1:10)         |
| 10         | Positive (3.53)                      | Positive (1:10)         |
| 11         | Positive (4.02)                      | Positive (1:10)         |
| 12         | Positive (10.08)                     | Positive (1:40)         |
| 13         | Positive (2.44)                      | Negative                |
| 14         | Positive (2.18)                      | Negative                |
| 15         | Positive (4.67)                      | Negative                |
| 16         | Positive (2.18)                      | Negative                |
| 17         | Positive (2.43)                      | Negative                |
| 18         | Positive (5.55)                      | Negative                |
| 19         | Positive (4.48)                      | Positive (1:10)         |
| 20         | Positive (4.16)                      | Negative                |
| 21         | Positive (2.97)                      | Positive (1:20)         |
| 22         | Positive (5.46)                      | Positive (1:20)         |
| 23         | Positive (2.72)                      | Positive (1:20)         |
| 24         | Positive (13.73)                     | Positive (1:40)         |
| 25         | Positive (5.94)                      | Positive (1:20)         |
| 26         | Positive (4.04)                      | Negative                |
| 27         | Positive (3.04)                      | Negative                |
| 28         | Positive (3.09)                      | Positive (1:20)         |
| 29         | Positive (5.4)                       | Negative                |
| 30         | Positive (6.08)                      | Positive (1:10)         |
| 31         | Positive (3.49)                      | Negative                |
| 32         | Positive (10.54)                     | Positive (1:10)         |
| 33         | Positive (2.32)                      | Negative                |
| 34         | Positive (2.83)                      | Negative                |
| 35         | Positive (4.19)                      | Positive (1:10)         |
| 36         | Positive (2.95)                      | Negative                |
| 37         | Positive (2.5)                       | Negative                |
| 38         | Positive (2.7)                       | Negative                |
| 39         | Positive (2.32)                      | Negative                |
| 40         | Positive (2.08)                      | Negative                |
| 41         | Positive (3.53)                      | Negative                |
| 42         | Positive (4.8)                       | Negative                |
| 43         | Positive (5.59)                      | Positive (1:10)         |
| 44         | Positive (2.92)                      | Negative                |
| 45         | Positive (3.92)                      | Positive (1:10)         |
| 46         | Positive (6.45)                      | Negative                |
| 47         | Positive (3.15)                      | Negative                |

|    |                  |                 |
|----|------------------|-----------------|
| 48 | Positive (3.97)  | Negative        |
| 49 | Positive (3.91)  | Positive (1:10) |
| 50 | Positive (6.32)  | Positive (1:20) |
| 51 | Positive (3.81)  | Positive (1:10) |
| 52 | Positive (6.48)  | Negative        |
| 53 | Positive (5.82)  | Positive (1:20) |
| 54 | Positive (2.28)  | Negative        |
| 55 | Positive (2.74)  | Negative        |
| 56 | Positive (2.87)  | Negative        |
| 57 | Positive (2.35)  | Negative        |
| 58 | Positive (2.29)  | Negative        |
| 59 | Positive (6.73)  | Positive (1:20) |
| 60 | Positive (5.29)  | Negative        |
| 61 | Positive (4.25)  | Negative        |
| 62 | Positive (2.3)   | Negative        |
| 63 | Positive (15.35) | Negative        |
| 64 | Positive (3.86)  | Positive (1:10) |
| 65 | Positive (2.52)  | Negative        |
| 66 | Positive (4.78)  | Negative        |
| 67 | Positive (8.22)  | Positive (1:10) |
| 68 | Positive (7.51)  | Negative        |
| 69 | Positive (2.89)  | Negative        |
| 70 | Positive (5.78)  | Negative        |
| 71 | Positive (4.33)  | Negative        |
| 72 | Positive (2.19)  | Negative        |
| 73 | Positive (11.31) | Positive (1:10) |
| 74 | Positive (2.08)  | Negative        |
| 75 | Positive (8.9)   | Positive (1:10) |
| 76 | Positive (3.62)  | Positive (1:10) |
| 77 | Positive (5.25)  | Positive (1:10) |
| 78 | Positive (3.44)  | Positive (1:10) |
| 79 | Positive (12.66) | Positive (1:10) |
| 80 | Positive (12.7)  | Positive (1:10) |
| 81 | Positive (12.99) | Positive (1:10) |
| 82 | Positive (11.67) | Positive (1:10) |
| 83 | Positive (2.33)  | Positive (1:20) |
| 84 | Positive (2.62)  | Negative        |
| 85 | Positive (2.74)  | Positive (1:20) |
| 86 | Positive (2.27)  | Positive (1:10) |
| 87 | Positive (2.14)  | Positive (1:10) |
| 88 | Positive (18.56) | Positive (1:10) |
| 89 | Positive (2.69)  | Negative        |
| 90 | Positive (10.31) | Negative        |
| 91 | Positive (12.91) | Positive (1:10) |
| 92 | Positive (8.75)  | Positive (1:10) |
| 93 | Positive (4.86)  | Positive (1:10) |
| 94 | Positive (15.31) | Negative        |
| 95 | Positive (8.31)  | Negative        |
| 96 | Positive (10.73) | Positive (1:10) |
| 97 | Positive (5.72)  | Positive (1:20) |
| 98 | Positive (2.24)  | Positive (1:10) |
| 99 | Positive (9.83)  | Positive (1:10) |

|     |                  |                 |
|-----|------------------|-----------------|
| 100 | Positive (2.05)  | Positive (1:10) |
| 101 | Positive (2.31)  | Positive (1:40) |
| 102 | Positive (2.22)  | Positive (1:40) |
| 103 | Positive (2.02)  | Positive (1:20) |
| 104 | Positive (8.6)   | Positive (1:10) |
| 105 | Positive (9.88)  | Positive (1:10) |
| 106 | Positive (8.3)   | Positive (1:10) |
| 107 | Positive (18.09) | Positive (1:10) |
| 108 | Positive (3.52)  | Negative        |
| 109 | Positive (24.18) | Positive (1:10) |
| 110 | Positive (12.94) | Positive (1:10) |
| 111 | Positive (7.89)  | Positive (1:10) |
| 112 | Positive (4.89)  | Positive (1:20) |
| 113 | Positive (4.59)  | Positive (1:10) |
